# Supplementary material for: Aware of the Future?
Source: Atypon-hosted journal article supplement (doi:10.1027/2698-1866/a000014), 2021-08-27
Supplement: 2698-1866_a000014_esm1.pdf [file 2698-1866_a000014_esm1.pdf]

**Electronic Supplementary Material 1**

ESM1. *Demographics of each region subsample.*

| Demographic categories                  | Scotland    |      | Wales       |      | Kent        |      |
|-----------------------------------------|-------------|------|-------------|------|-------------|------|
|                                         | Frequency   | %    | Frequency   | %    | Frequency   | %    |
| <i>Gender</i>                           |             |      |             |      |             |      |
| Male                                    | 279         | 48.2 | 228         | 41.7 | 236         | 42.3 |
| Female                                  | 299         | 51.6 | 319         | 58.3 | 293         | 52.5 |
| Undisclosed                             | 1           | 0.2  | 0           | 0    | 29          | 5.2  |
| <i>Age</i>                              |             |      |             |      |             |      |
| 18-24                                   | 27          | 4.7  | 28          | 5.1  | 15          | 2.7  |
| 25-34                                   | 82          | 14.1 | 61          | 11.2 | 40          | 7.2  |
| 35-44                                   | 125         | 21.6 | 86          | 15.7 | 60          | 10.7 |
| 45-54                                   | 72          | 12.4 | 92          | 16.8 | 111         | 19.9 |
| 55-64                                   | 122         | 21.1 | 132         | 24.1 | 110         | 19.7 |
| 65-74                                   | 128         | 22.1 | 116         | 21.2 | 146         | 26.2 |
| 75+                                     | 23          | 4.0  | 32          | 5.9  | 48          | 8.6  |
| Undisclosed                             | 0           | 0    | 0           | 0    | 28          | 5.0  |
| <i>Annual household income</i>          |             |      |             |      |             |      |
| Less than £15,000                       | 83          | 14.3 | 85          | 15.5 | 61          | 10.9 |
| £15,000 to £30,000                      | 133         | 23.0 | 166         | 30.3 | 139         | 24.9 |
| £30,000 to £40,000                      | 105         | 18.1 | 91          | 16.6 | 87          | 15.6 |
| £40,000 to £60,000                      | 112         | 19.3 | 82          | 15.0 | 102         | 18.3 |
| £60,000 to £100,000                     | 51          | 8.8  | 54          | 9.9  | 65          | 11.6 |
| More than £100,000                      | 17          | 2.9  | 5           | 0.9  | 22          | 3.9  |
| Undisclosed                             | 78          | 13.5 | 64          | 11.7 | 82          | 14.7 |
| <i>Political orientation</i>            |             |      |             |      |             |      |
| Left-wing                               | 216         | 37.3 | 193         | 35.3 | 132         | 23.7 |
| Centre                                  | 221         | 38.2 | 207         | 37.8 | 200         | 35.8 |
| Right-wing                              | 140         | 24.2 | 145         | 26.5 | 225         | 40.3 |
| Undisclosed                             | 2           | 0.3  | 2           | 0.4  | 1           | 0.2  |
| <i>Subjective socio-economic status</i> |             |      |             |      |             |      |
| Mean (SD)                               | 4.37 (1.32) |      | 4.24 (1.27) |      | 4.49 (1.34) |      |
| Total                                   | 579         | 100% | 547         | 100% | 558         | 100% |
