# Supplementary material for: Aware of the Future?
Source: Atypon-hosted journal article supplement (doi:10.1027/2698-1866/a000014), 2021-08-27
Supplement: 2698-1866_a000014_esm2.pdf [file 2698-1866_a000014_esm2.pdf]

**Electronic Supplementary Material 2**

ESM2. CFA results: Variance estimates of items and latent variables, and proportion of variance explained ( $R^2$ ).

| Variiances     | Estimate | SE   | z-value | p-value | Standardised estimate |
|----------------|----------|------|---------|---------|-----------------------|
| Items          |          |      |         |         |                       |
| TP1            | 0.58     | .021 | 27.51   | < .001  | .844                  |
| TP2            | 0.41     | .016 | 25.80   | < .001  | .720                  |
| TP3            | 0.73     | .027 | 27.09   | < .001  | .802                  |
| TP4            | 0.32     | .018 | 17.53   | < .001  | .446                  |
| AB1            | 0.26     | .031 | 8.49    | < .001  | .317                  |
| AB2            | 0.98     | .036 | 27.18   | < .001  | .862                  |
| AB3            | 0.39     | .016 | 25.21   | < .001  | .753                  |
| AB4            | 0.86     | .035 | 24.63   | < .001  | .734                  |
| OA1            | 0.44     | .018 | 25.06   | < .001  | .623                  |
| OA2            | 0.53     | .021 | 25.12   | < .001  | .628                  |
| OA3            | 0.39     | .016 | 24.27   | < .001  | .565                  |
| OA4            | 1.17     | .041 | 28.42   | < .001  | .910                  |
| SP1            | 0.68     | .027 | 25.41   | < .001  | .693                  |
| SP2            | 0.89     | .034 | 26.35   | < .001  | .751                  |
| SP3            | 0.35     | .015 | 23.59   | < .001  | .607                  |
| SP4            | 0.49     | .020 | 24.41   | < .001  | .642                  |
| CO1            | 0.29     | .014 | 20.85   | < .001  | .519                  |
| CO2            | 0.40     | .018 | 22.57   | < .001  | .577                  |
| CO3            | 0.61     | .026 | 23.21   | < .001  | .602                  |
| CO4            | 0.50     | .020 | 24.82   | < .001  | .675                  |
| Latent factors |          |      |         |         |                       |
| TP             | 0.02     | .005 | 5.07    | < .001  | .224                  |
| AB             | 0.40     | .034 | 11.81   | < .001  | .710                  |
| OA*            | 0.001    |      |         |         | .004                  |
| SP             | 0.06     | .011 | 5.10    | < .001  | .184                  |
| CO             | 0.15     | .012 | 11.78   | < .001  | .538                  |
| FC             | 0.08     | .012 | 7.14    | < .001  | 1.00                  |

\*Note. The Openness to Alternatives latent factor had a negative variance, although not significantly different from 0 (estimate = -.014, SE = .010,  $p = .15$ ), i.e., a Heywood case. We replace it by a fixed, small but positive value (0.001)

| Explained variance | $R^2$ |
|--------------------|-------|
| Items              |       |
| TP1                | .156  |
| TP2                | .280  |
| TP3                | .198  |
| TP4                | .554  |
| AB1                | .683  |
| AB2                | .138  |
| AB3                | .247  |
| AB4                | .266  |
| OA1                | .377  |
| OA2                | .372  |
| OA3                | .435  |
| OA4                | .090  |
| SP1                | .307  |
| SP2                | .249  |
| SP3                | .393  |
| SP4                | .358  |
| CO1                | .481  |
| CO2                | .423  |
| CO3                | .398  |
| CO4                | .325  |
| Latent factors     |       |
| TP                 | .776  |
| AB                 | .290  |
| OA                 | .996  |
| SP                 | .816  |
| CO                 | .462  |
