# Supplementary material for: Aware of the Future?
Source: Atypon-hosted journal article supplement (doi:10.1027/2698-1866/a000014), 2021-08-27
Supplement: 2698-1866_a000014_esm3.pdf [file 2698-1866_a000014_esm3.pdf]

**Electronic Supplementary Material 3**

ESM3. Descriptive statistics and correlations of the 20 items forming the Revised FC Scale.

|                               | <i>M</i> | <i>SD</i> | Pearson's correlations |        |        |        |         |         |         |         |         |        |         |         |         |         |         |         |        |         |         |
|-------------------------------|----------|-----------|------------------------|--------|--------|--------|---------|---------|---------|---------|---------|--------|---------|---------|---------|---------|---------|---------|--------|---------|---------|
|                               |          |           | 2                      | 3      | 4      | 5      | 6       | 7       | 8       | 9       | 10      | 11     | 12      | 13      | 14      | 15      | 16      | 17      | 18     | 19      | 20      |
| Time perspective (TP)         |          |           |                        |        |        |        |         |         |         |         |         |        |         |         |         |         |         |         |        |         |         |
| 1 (TP1)                       | 3.90     | .83       | .20***                 | .15*** | .27*** | .18*** | .03     | .20***  | .06*    | .18***  | .16***  | .30*** | -.06*   | .16***  | .16***  | .29***  | .21***  | .27***  | .18*** | .12***  | .22***  |
| 2 (TP2)                       | 3.84     | .76       |                        | .21*** | .43*** | .19*** | .02     | .16***  | -.05    | .24***  | .30***  | .30*** | -.09*** | .17***  | .14***  | .29***  | .24***  | .29***  | .22*** | .22***  | .26***  |
| 3 (TP3*)                      | 3.23     | .96       |                        |        | .33*** | .17*** | .05*    | .06*    | .02     | .30***  | .26***  | .27*** | -.12*** | .19***  | .12***  | .26***  | .22***  | .18***  | .10*** | .23***  | .15***  |
| 4 (TP4*)                      | 3.46     | .85       |                        |        |        | .34*** | -.09*** | .24***  | .15***  | .40***  | .44***  | .42*** | -.12*** | .28***  | .27***  | .35***  | .35***  | .34***  | .27*** | .35***  | .26***  |
| Agency beliefs (AB)           |          |           |                        |        |        |        |         |         |         |         |         |        |         |         |         |         |         |         |        |         |         |
| 5 (AB1)                       | 3.44     | .91       |                        |        |        |        | -.32*** | .39***  | .44***  | .37***  | .35***  | .28*** | -.06*   | .17***  | .22***  | .25***  | .24***  | .19***  | .20*** | .11***  | .12***  |
| 6 (AB2)                       | 3.00     | 1.07      |                        |        |        |        |         | -.23*** | -.49*** | -.11*** | -.10*** | -.05*  | .14***  | -.03    | -.20*** | -.06*   | -.03    | -.05*   | .01    | .03     | -.05    |
| 7 (AB3)                       | 3.68     | .72       |                        |        |        |        |         |         | .30***  | .21***  | .19***  | .22*** | .03     | .13***  | .16***  | .22***  | .15***  | .18***  | .20*** | .05*    | .11***  |
| 8 (AB4*)                      | 3.25     | 1.09      |                        |        |        |        |         |         |         | .17***  | .17***  | .11*** | .02     | .06*    | .22***  | .08*    | .06*    | .09***  | .09*** | .01     | .07**   |
| Openness to alternatives (OA) |          |           |                        |        |        |        |         |         |         |         |         |        |         |         |         |         |         |         |        |         |         |
| 9 (OA1)                       | 3.31     | .84       |                        |        |        |        |         |         |         |         | .58***  | .39*** | -.17*** | .29***  | .29***  | .35***  | .42***  | .24***  | .21*** | .24***  | .19***  |
| 10 (OA2)                      | 3.43     | .92       |                        |        |        |        |         |         |         |         |         | .39*** | -.18*** | .26***  | .29***  | .30***  | .37***  | .25***  | .22*** | .27***  | .19***  |
| 11 (OA3)                      | 3.68     | .83       |                        |        |        |        |         |         |         |         |         |        | -.22*** | .31***  | .28***  | .42***  | .34***  | .32***  | .29*** | .31***  | .29***  |
| 12 (OA4)                      | 2.90     | 1.14      |                        |        |        |        |         |         |         |         |         |        |         | -.22*** | -.21*** | -.25*** | -.22*** | -.09*** | -.07** | -.22*** | -.19*** |
| Systems perception (SP)       |          |           |                        |        |        |        |         |         |         |         |         |        |         |         |         |         |         |         |        |         |         |
| 13 (SP1)                      | 3.61     | .99       |                        |        |        |        |         |         |         |         |         |        |         |         | .38***  | .35***  | .32***  | .23***  | .24*** | .29***  | .27***  |
| 14 (SP2)                      | 3.40     | 1.09      |                        |        |        |        |         |         |         |         |         |        |         |         |         | .26***  | .27***  | .24***  | .20*** | .23***  | .25***  |
| 15 (SP3*)                     | 3.75     | .76       |                        |        |        |        |         |         |         |         |         |        |         |         |         |         | .38***  | .25***  | .19*** | .23***  | .28***  |
| 16 (SP4*)                     | 3.36     | .88       |                        |        |        |        |         |         |         |         |         |        |         |         |         |         |         | .22***  | .19*** | .23***  | .18***  |
| Concern for others (CO)       |          |           |                        |        |        |        |         |         |         |         |         |        |         |         |         |         |         |         |        |         |         |
| 17 (CO1)                      | 3.95     | .75       |                        |        |        |        |         |         |         |         |         |        |         |         |         |         |         |         | .48*** | .41***  | .40***  |
| 18 (CO2)                      | 3.74     | .83       |                        |        |        |        |         |         |         |         |         |        |         |         |         |         |         |         |        | .43***  | .36***  |
| 19 (CO3)                      | 3.28     | 1.01      |                        |        |        |        |         |         |         |         |         |        |         |         |         |         |         |         |        |         | .35***  |
| 20 (CO4)                      | 3.98     | .86       |                        |        |        |        |         |         |         |         |         |        |         |         |         |         |         |         |        |         |         |

\*  $p < .05$ , \*\*  $p < .01$ , \*\*\*  $p < .001$
