# Supplementary material for: Aware of the Future?
Source: Atypon-hosted journal article supplement (doi:10.1027/2698-1866/a000014), 2021-08-27
Supplement: 2698-1866_a000014_esm4.pdf [file 2698-1866_a000014_esm4.pdf]

## Electronic Supplementary Material 4

ESM4. *Items of the Revised Futures Consciousness Scale.*

---

### ***Time Perspective***

---

- TP1 I think about the consequences before I do something  
TP2 I think about how things might be in the future  
TP3\* I am willing to sacrifice my immediate happiness or well-being in order to achieve something in the future  
TP4\* I consider how things might be in the future, and try to influence those things with my day to day behavior

---

### ***Agency Beliefs***

---

- AB1 I believe I can succeed at most any endeavor to which I set my mind  
AB2 I hardly ever expect things to go my way  
AB3 I am usually able to protect my personal interests  
AB4\* I am always optimistic about my future

---

### ***Openness to Alternatives***

---

- OA1 I often use new ideas to shape (modify) the way I do things  
OA2 I am often on the lookout for new ideas  
OA3 I often re-evaluate my experiences so that I can learn from them  
OA4 I find it boring to discuss philosophy

---

### ***Systems Perception***

---

- SP1 I think that all the Earth's systems, from the climate to the economy, are interconnected  
SP2 I have had the experience of feeling "at one" with nature  
SP3\* I think understanding how a chain of events occur is crucial  
SP4\* I easily see connections between events and things even when they first seem unrelated

---

### ***Concern for Others***

---

- CO1 I show concern and care for peers  
CO2 I believe in being loyal to all mankind  
CO3 When they are in need, I want to help people all over the world  
CO4 Benevolence (that is, helpfulness, honesty, forgiveness, loyalty, and responsibility) is an important life-guiding principle for me.
-
